# Supplementary material
Source: Springer Nature journal article supplement (https://www.springermedizin.de/resource/supplementary/13019_2012_609_MOESM2_ESM.pdf/9638994)

# Results Biology I

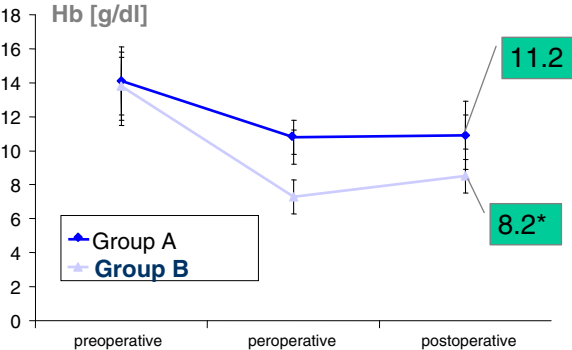

Supplement: MOESM2 [file 9638994]
